# Supplementary material for: Cell-Free Circulating Methylated SEPT9 for Noninvasive Diagnosis and Monitoring of Colorectal Cancer
Source: Hindawi journal article supplement (doi:10.1155/2018/6437104), 2018-01-01
Supplement: f1 [file 6437104.f1.pdf]

## Supplementary Files

**Supplementary Table S1** Positive rate of plasma mSEPT9 in each enrolled group using 1/3 algorithm.

| Characteristics       | N   | mSEPT9 |       |
|-----------------------|-----|--------|-------|
|                       |     | N      | %     |
| CRC                   | 98  | 79     | 80.6  |
| 0                     | 3   | 1      | 33.3  |
| I                     | 23  | 16     | 69.6  |
| II                    | 31  | 24     | 77.4  |
| III                   | 31  | 29     | 93.5  |
| IV                    | 8   | 8      | 100.0 |
| Unknown               | 2   | 1      | 50.0  |
| Adenomas              | 101 | 17     | 16.8  |
| Non-colorectal Cancer | 76  | 29     | 38.2  |
| Gastric cancer        | 10  | 8      | 80.0  |
| Breast cancer         | 58  | 20     | 34.5  |
| Other cancer          | 8   | 1      | 12.5  |
| Inflammation          | 30  | 7      | 23.3  |
| Gastroenteritis       | 26  | 6      | 23.1  |
| Other Inflammation    | 4   | 1      | 25.0  |
| NED                   | 253 | 35     | 13.8  |

CRC, colorectal cancer; NED, no evidence of diseases; <sup>†</sup>, compared with NED (Ref.); <sup>‡</sup>, compared with CRC (Ref.).

**Supplementary Table S2** Diagnostic test evaluation of plasma mSEPT9 for CRC using 1/3 algorithm.

|                      | mSEPT9 <sup>†</sup>       | mSEPT9 <sup>‡</sup>      |
|----------------------|---------------------------|--------------------------|
| Sensitivity (95% CI) | 80.61% (71.69% - 87.22%)  | 80.61% (71.69% - 87.22%) |
| Specificity (95% CI) | 86.17% (81.37% - 89.88%)  | 80.87% (77.03% - 84.20%) |
| PPV (95% CI)         | 69.30% (60.32% - 77.02%)  | 47.31% (39.88% - 54.85%) |
| NPV (95% CI)         | 91.98% (87.82% - 94.81% ) | 95.14% (92.54% - 96.87%) |

PPV, positive predictive value; NPV, negative predictive value; CI, confidence interval; <sup>†</sup>, mSEPT9 in subjects with colorectal cancer versus no evidence of diseases; <sup>‡</sup>, mSEPT9 in subjects with colorectal cancer versus all the other enrolled subjects including adenoma, non-colorectal cancer, inflammation, and no evidence of disease samples.
